# Supplementary material for: Review on non-relativistic gravity
Source: Frontiers journal article supplement (doi:10.3389/fphy.2023.1116888), 2023-03-16
Supplement: Data_Sheet_1.pdf [file Data_Sheet_1.pdf]

## Supplementary Appendix

### A Conventions

For a connection with torsion whose connection coefficients are  $\Gamma_{\mu\nu}^\rho$  the Riemann tensor  $R_{\mu\nu\sigma}{}^\rho$  and torsion tensor  $T_{\mu\nu}^\rho$  are given by

$$[\nabla_\mu, \nabla_\nu] X_\sigma = R_{\mu\nu\sigma}{}^\rho X_\rho - T_{\mu\nu}^\rho \nabla_\rho X_\sigma, \quad (\text{A.1})$$

$$[\nabla_\mu, \nabla_\nu] X^\rho = -R_{\mu\nu\sigma}{}^\rho X^\sigma - T_{\mu\nu}^\sigma \nabla_\sigma X^\rho, \quad (\text{A.2})$$

which implies

$$R_{\mu\nu\sigma}{}^\rho \equiv -\partial_\mu \Gamma_{\nu\sigma}^\rho + \partial_\nu \Gamma_{\mu\sigma}^\rho - \Gamma_{\mu\lambda}^\rho \Gamma_{\nu\sigma}^\lambda + \Gamma_{\nu\lambda}^\rho \Gamma_{\mu\sigma}^\lambda, \quad (\text{A.3})$$

$$T_{\mu\nu}^\rho \equiv 2\Gamma_{[\mu\nu]}^\rho. \quad (\text{A.4})$$

These obey the following Bianchi identities

$$R_{[\mu\nu\sigma]}{}^\rho = T_{[\mu\nu}^\lambda T_{\sigma]\lambda}^\rho - \nabla_{[\mu} T_{\nu\sigma]}^\rho, \quad (\text{A.5})$$

$$\nabla_{[\lambda} R_{\mu\nu]\sigma}{}^\kappa = T_{[\lambda\mu}^\rho R_{\nu]\rho\sigma}{}^\kappa. \quad (\text{A.6})$$

We define the Ricci tensor as

$$R_{\mu\nu} \equiv R_{\mu\rho\nu}{}^\rho. \quad (\text{A.7})$$

We will assume that the connection is such that

$$\Gamma_{\mu\rho}^\rho = \partial_\mu \log M, \quad (\text{A.8})$$

where  $M$  is the integration measure, so that

$$R_{\mu\nu\rho}{}^\rho = 0. \quad (\text{A.9})$$

### B Details for Trautman condition computation

In Section 3.4 it is left to show that  $h^{\mu[\gamma} \check{R}_{\mu(\nu\sigma)}^{\rho]} = 0$ . This expression can be shown to be Galilean boost invariant. We prove  $h^{\mu[\gamma} \check{R}_{\mu(\nu\sigma)}^{\rho]} = 0$  by showing that all the projections with  $v^\nu v^\sigma$ ,  $v^\nu h^{\sigma\lambda}$  and  $h^{\nu\kappa} h^{\sigma\lambda}$  give zero. We will use that

$$\check{\nabla}_\rho v^\mu = -h^{\mu\nu} K_{\rho\nu}, \quad (\text{B.1})$$

where  $K_{\mu\nu} = -\frac{1}{2} \mathcal{L}_v h_{\mu\nu}$  with  $\mathcal{L}_v$  the Lie derivative along  $v^\mu$ . Using the definition of the Riemann tensor as well as (B.1) it follows that

$$v^\nu v^\sigma \check{R}_{\mu\nu\sigma}{}^\rho = -h^{\rho\lambda} v^\kappa \check{\nabla}_\kappa K_{\mu\lambda}. \quad (\text{B.2})$$

Hence we find  $h^{\mu[\gamma} \check{R}_{\mu(\nu\sigma)}^{\rho]} v^\nu v^\sigma = 0$  which holds since  $h^{\mu\nu}$  is covariantly constant and we also used the fact that  $K_{\mu\nu}$  is symmetric. We next turn to the projection of  $h^{\mu[\gamma} \check{R}_{\mu(\nu\sigma)}^{\rho]} = 0$  with  $h^{\nu\kappa} h^{\sigma\lambda}$ . To this end define

$$X^{\alpha\beta\mu\nu} = h^{\alpha\rho} h^{\beta\sigma} \check{R}_{\rho\sigma\kappa}{}^\nu h^{\mu\kappa}. \quad (\text{B.3})$$

The tensor  $X^{\alpha\beta\mu\nu}$  is antisymmetric in its first two and last two indices<sup>1</sup>. It also obeys  $X^{[\alpha\beta\mu]\nu} = 0$ . Adding and subtracting  $X^{[\alpha\beta\mu]\nu} = 0$ ,  $X^{[\alpha\beta\nu]\mu} = 0$ ,  $X^{[\beta\mu\nu]\alpha} = 0$  and  $X^{[\mu\nu\alpha]\beta} = 0$  appropriately we obtain  $X^{\alpha\beta\mu\nu} = X^{\mu\nu\alpha\beta}$ . This can be used to show that  $X^{\mu(\nu\alpha)\beta} - X^{\beta(\nu\alpha)\mu} = 0$  which is equivalent to  $h^{\rho[\alpha}\check{R}_{\rho(\sigma\kappa)}^{\nu]}h^{\beta\sigma}h^{\mu\kappa} = 0$ .

Finally we need to show that  $h^{\rho[\alpha}\check{R}_{\rho(\sigma\kappa)}^{\nu]}v^{\sigma}h^{\mu\kappa} = 0$ . To this end define

$$Y^{\alpha\mu\nu} = h^{\rho\alpha}\check{R}_{\rho\sigma\kappa}^{\nu}v^{\sigma}h^{\mu\kappa}. \quad (\text{B.4})$$

In terms of this new object we have

$$4h^{\rho[\alpha}\check{R}_{\rho(\sigma\kappa)}^{\nu]}v^{\sigma}h^{\mu\kappa} = Y^{\alpha\mu\nu} - Y^{\nu\mu\alpha} + 2h^{\rho[\alpha}\check{R}_{\rho\kappa\sigma}^{\nu]}v^{\sigma}h^{\mu\kappa}. \quad (\text{B.5})$$

Using  $\check{R}_{[\rho\sigma\kappa]}^{\nu} = 0$  we can show that

$$Y^{\alpha\mu\nu} - Y^{\mu\alpha\nu} + h^{\rho\alpha}\check{R}_{\kappa\rho\sigma}^{\nu}v^{\sigma}h^{\mu\kappa} = 0. \quad (\text{B.6})$$

Cyclically permuting the indices on this last equation leads to two more equations. Adding and subtracting these off (B.6) leads to

$$2Y^{\alpha\mu\nu} = -h^{\rho\alpha}\check{R}_{\kappa\rho\sigma}^{\nu}v^{\sigma}h^{\mu\kappa} - h^{\rho\nu}\check{R}_{\kappa\rho\sigma}^{\mu}v^{\sigma}h^{\kappa\alpha} + h^{\rho\mu}\check{R}_{\kappa\rho\sigma}^{\alpha}v^{\sigma}h^{\kappa\nu}. \quad (\text{B.7})$$

This tells us that

$$Y^{\alpha\mu\nu} - Y^{\nu\mu\alpha} = -h^{\rho\nu}\check{R}_{\kappa\rho\sigma}^{\mu}v^{\sigma}h^{\kappa\alpha}. \quad (\text{B.8})$$

This in turn can be used to obtain

$$4h^{\rho[\alpha}\check{R}_{\rho(\sigma\kappa)}^{\nu]}v^{\sigma}h^{\mu\kappa} = -h^{\rho\nu}\check{R}_{\kappa\rho\sigma}^{\mu}v^{\sigma}h^{\kappa\alpha} + h^{\rho\alpha}\check{R}_{\rho\kappa\sigma}^{\nu}v^{\sigma}h^{\mu\kappa} - h^{\rho\nu}\check{R}_{\rho\kappa\sigma}^{\alpha}v^{\sigma}h^{\mu\kappa}. \quad (\text{B.9})$$

Finally, using

$$\check{R}_{\kappa\rho\sigma}^{\mu}v^{\sigma} = h^{\mu\gamma}(\check{\nabla}_{\kappa}K_{\rho\gamma} - \check{\nabla}_{\rho}K_{\kappa\gamma}), \quad (\text{B.10})$$

which follows from the definition of the Riemann tensor and (B.1), we obtain the result that

$$h^{\rho[\alpha}\check{R}_{\rho(\sigma\kappa)}^{\nu]}v^{\sigma}h^{\mu\kappa} = 0. \quad (\text{B.11})$$

---

<sup>1</sup>Antisymmetry in the last two indices follows from  $[\check{\nabla}_{\rho}, \check{\nabla}_{\sigma}]h^{\mu\nu} = 0$  which leads to  $\check{R}_{\rho\sigma\kappa}^{(\nu}h^{\mu)\kappa} = 0$ .
